# Supplementary material for: Insulin-induced hypoglycemia increases hepatic sensitivity to glucagon in dogs
Source: JCI journal article supplement (doi:10.1172/jci40919), 2010-11-17
Supplement: sd1 [file 1]

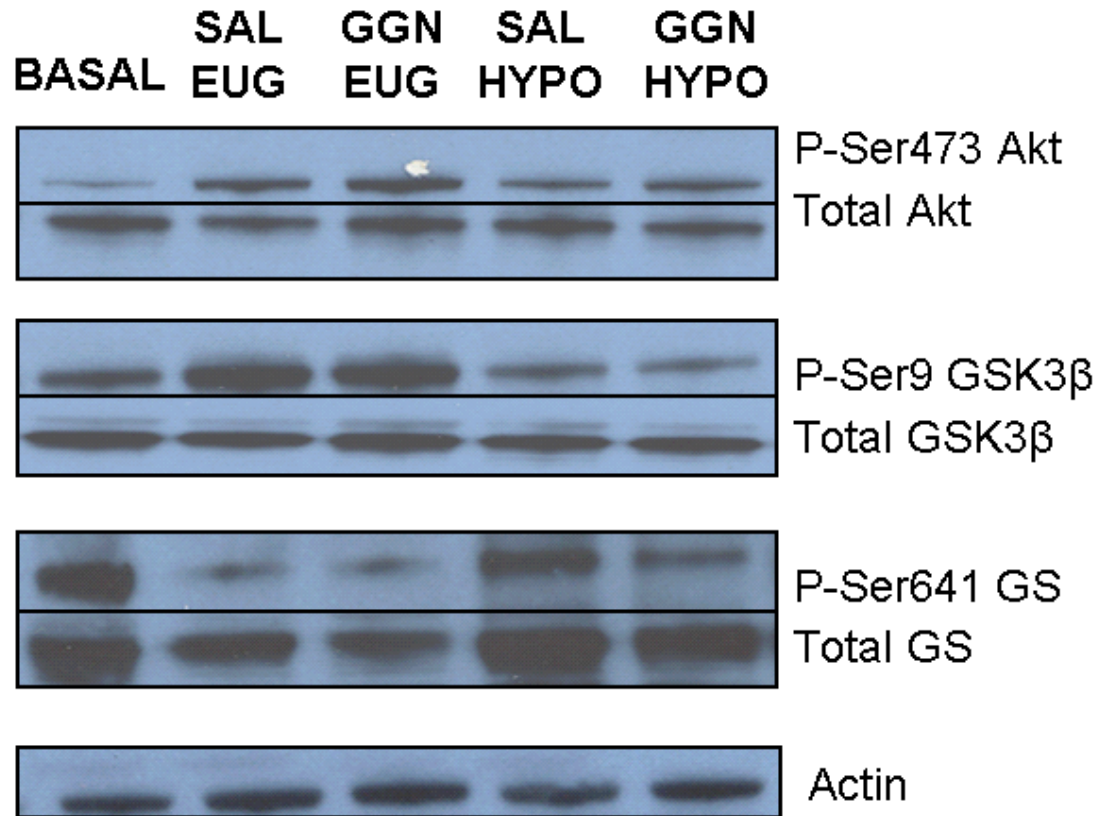

**Supplementary Figure 1.** Representative Western blots (of n=3-4) for markers of insulin signaling and glycogen metabolism as shown in Figures 5. 18h fasted conscious dogs subjected to a physiologic rise in glucagon during hyperinsulinemic euglycemic and hyperinsulinemic hypoglycemic conditions. Animals were compared to a basal group (overnight fasted animals maintained at euglycemia during a pancreatic clamp with portal replacement of basal insulin and basal glucagon).

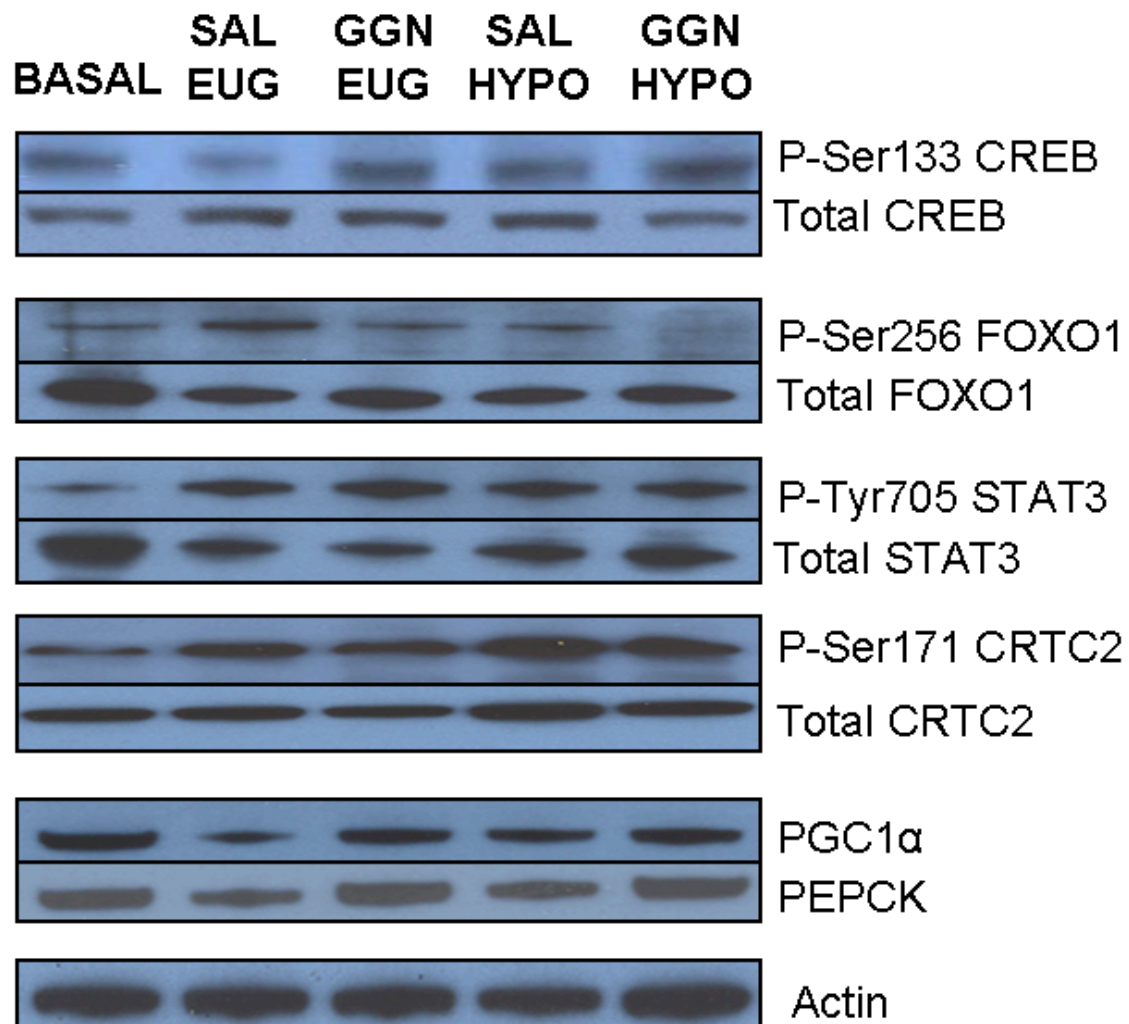

**Supplementary Figure 2.** Representative Western blots (of n=3-4) for markers of glucagon signaling and the regulation of gluconeogenesis as shown in Figures 5 and 6. 18h fasted conscious dogs subjected to a physiologic rise in glucagon during hyperinsulinemic euglycemic and hyperinsulinemic hypoglycemic conditions. Animals were compared to a basal group (overnight fasted animals maintained at euglycemia during a pancreatic clamp with portal replacement of basal insulin and basal glucagon).

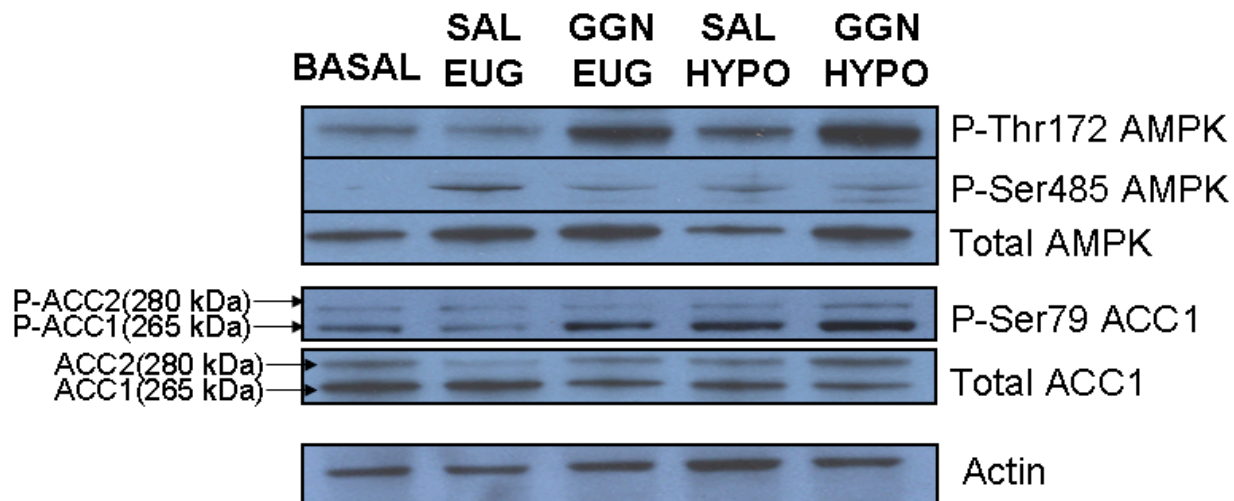

**Supplementary Figure 3.** Representative Western blots (of n=3-4) for AMPK phosphorylation as shown in Figures 7. 18h fasted conscious dogs subjected to a physiologic rise in glucagon during hyperinsulinemic euglycemic and hyperinsulinemic hypoglycemic conditions. Animals were compared to a basal group (overnight fasted animals maintained at euglycemia during a pancreatic clamp with portal replacement of basal insulin and basal glucagon).
